# Supplementary material for: Sexual and regional differences in the microbiome and functional metagenome of the lone star tick, Amblyomma americanum
Source: Research Square preprint supplement (doi:10.21203/rs.3.rs-7152036/v1), 2025-08-08
Supplement: Supplementary file 1 [file 07dd034b274ed81c2fce130f.xlsx]

## Sheet: Western M v F
Pathway	Comparison	Reference	coefficient	stderr	pval	qval	N
Vitamin.B5..Pantothenic.Acid..Biosynthesis	Sex	Female	-0.58906	0.094323	7.19e-09	1.26e-07	118
Carboxylic.Acid.Biosynthesis	Sex	Female	-0.58654	0.103591	1.1e-07	6.43e-07	118
Vitamin.B2..Riboflavin..Biosynthesis	Sex	Female	-0.54959	0.092568	3.09e-08	2.67e-07	118
Anhydromuropeptide.Recycling	Sex	Female	-0.51609	0.102877	1.91e-06	3.94e-06	118
Nucleic.Acid.Processing	Sex	Female	-0.46837	0.099989	7.7e-06	1.25e-05	118
Tetrapyrrole.Biosynthesis	Sex	Female	-0.45044	0.088661	1.45e-06	3.18e-06	118
X6.Hydroxymethyl.Dihydropterin.Diphosphate.Biosynthesis	Sex	Female	-0.44768	0.082116	2.85e-07	9.07e-07	118
Coenzyme.A.Biosynthesis	Sex	Female	-0.41387	0.071398	5.94e-08	3.78e-07	118
Heme.Biosynthesis	Sex	Female	-0.39598	0.08975	2.31e-05	3.23e-05	118
Cell.Structure.Biosynthesis	Sex	Female	-0.37054	0.078487	6.62e-06	1.1e-05	118
Vitamin.B3..Nicotinamide..Biosynthesis	Sex	Female	-0.36363	0.050547	6.67e-11	4.67e-09	118
Metabolic.Regulator.Biosynthesis	Sex	Female	-0.32077	0.130216	0.015231	0.01777	118
Nucleoside.and.Nucleotide.Biosynthesis	Sex	Female	-0.31856	0.052622	1.79e-08	2.08e-07	118
Fatty.Acid.and.Lipid.Biosynthesis	Sex	Female	-0.27587	0.062407	2.23e-05	3.18e-05	118
Vitamin.B1..Thiamine..Biosynthesis	Sex	Female	-0.2225	0.04052	2.39e-07	9.01e-07	118
Glycolysis	Sex	Female	-0.08509	0.036767	0.02241	0.0249	118
Carbohydrate.Biosynthesis	Sex	Female	-0.05106	0.024619	0.040309	0.044088	118
Amino.Acid.Biosynthesis	Sex	Female	0.265172	0.057803	1.14e-05	1.78e-05	118
Generation.of.Precursor.Metabolites.and.Energy	Sex	Female	0.276309	0.052395	6.28e-07	1.69e-06	118
Secondary.Metabolite.Biosynthesis	Sex	Female	0.30563	0.059597	1.18e-06	2.96e-06	118
Polyprenyl.Biosynthesis	Sex	Female	0.571267	0.149968	0.000225	0.000291	118
Toxin.Biosynthesis	Sex	Female	0.627474	0.209765	0.003393	0.004026	118
Carbohydrate.Degradation	Sex	Female	0.642634	0.149358	3.54e-05	4.68e-05	118
Fucose.and.Rhamnose.Degradation.Superpathway	Sex	Female	0.708161	0.345215	0.042484	0.045752	118
Degradation.Utilizatiossimilation	Sex	Female	0.71666	0.210122	0.000892	0.001096	118
C1.Compound.Utilization.and.Assimilation	Sex	Female	0.880032	0.363677	0.017081	0.019601	118
Metabolite.Interconversion	Sex	Female	0.910298	0.240994	0.000252	0.00032	118
Vitamin.B6.Biosynthesis	Sex	Female	1.18926	0.267301	1.99e-05	2.9e-05	118
CO2.Fixation	Sex	Female	1.19287	0.214372	1.72e-07	8.01e-07	118
Nucleoside.and.Nucleotide.Degradation	Sex	Female	1.21862	0.254307	4.93e-06	8.42e-06	118
Fatty.Acid.and.Lipid.Degradation	Sex	Female	1.24723	0.246172	1.55e-06	3.28e-06	118
Carrier.Biosynthesis	Sex	Female	1.29048	0.293475	2.44e-05	3.35e-05	118
Reductant.Biosynthesis	Sex	Female	1.3522	0.313666	3.43e-05	4.61e-05	118
TCA.cycle	Sex	Female	1.38943	0.283521	3.13e-06	5.84e-06	118
Vitamin.C..L.Ascorbate..Degradation	Sex	Female	1.40783	0.396739	0.00056	0.0007	118
Alcohol.Degradation	Sex	Female	1.41082	0.276399	1.31e-06	3.06e-06	118
Coenzyme.M.Bionsythesis	Sex	Female	1.50452	0.303092	2.39e-06	4.66e-06	118
Butanediol.Biosynthesis	Sex	Female	1.51845	0.314735	4.31e-06	7.54e-06	118
Aminoacyl.tRNA.Charging	Sex	Female	1.53875	0.341466	1.58e-05	2.36e-05	118
Vitamin.B6..Pyridoxal..Biosynthesis	Sex	Female	1.5395	0.340098	1.46e-05	2.22e-05	118
Formaldehyde.Assimilation	Sex	Female	1.56532	0.278733	1.36e-07	7.32e-07	118
Aromatic.Compound.Biosynthesis	Sex	Female	1.56993	0.516987	0.002954	0.003566	118
Formaldehyde.Oxidation	Sex	Female	1.57628	0.653242	0.017387	0.019631	118
Amide..Amidine..Amine..and.Polyamine.Biosynthesis	Sex	Female	1.61184	0.303034	5.14e-07	1.5e-06	118
Carboxylic.Acid.Degradation	Sex	Female	1.62656	0.302433	3.96e-07	1.2e-06	118
Enzyme.Cofactor.Biosynthesis	Sex	Female	1.63087	0.297825	2.56e-07	9.01e-07	118
Inorganic.Nutrient.Metabolism	Sex	Female	1.66763	0.304624	2.58e-07	9.01e-07	118
Arsenic.Compound.Detoxification	Sex	Female	1.68557	0.349303	4.29e-06	7.54e-06	118
Cyclitol.Degradation	Sex	Female	1.68859	0.320008	6.2e-07	1.69e-06	118
Amino.Acid.Degradation	Sex	Female	1.70285	0.334503	1.39e-06	3.14e-06	118
Hormone..Neurotransmitter..and.Signaling.Molecule.Degradation	Sex	Female	1.76368	0.296238	2.86e-08	2.67e-07	118
Nicotine.Degradation	Sex	Female	1.77477	0.277215	3.38e-09	7.89e-08	118
Amide..Amidine..Amine..and.Polyamine.Degradation	Sex	Female	1.84079	0.352805	8.03e-07	2.08e-06	118
Aromatic.Compound.Degradation	Sex	Female	1.86539	0.3402	2.48e-07	9.01e-07	118
D.glucarate.and.D.galactarate.Degradation.Superpathway	Sex	Female	1.88059	0.377147	2.18e-06	4.35e-06	118
Vitamin.B7..Biotin..Biosynthesis	Sex	Female	1.90337	0.321797	3.43e-08	2.67e-07	118
Storage.Compound.Biosynthesis	Sex	Female	1.92354	0.376649	1.3e-06	3.06e-06	118
Phenolic.Compound.Degradation	Sex	Female	2.04315	0.336671	1.67e-08	2.08e-07	118
Vitamin.B12..Cobalamin..Biosynthesis	Sex	Female	2.13121	0.33244	3.24e-09	7.89e-08	118
Aspartate.Superpathway	Sex	Female	2.22491	0.407565	2.76e-07	9.07e-07	118
Chlorinated.Compound.Degradation	Sex	Female	2.24287	0.407727	2.29e-07	9.01e-07	118
Aldehyde.degradation	Sex	Female	2.29193	0.467969	3.17e-06	5.84e-06	118
Electron.Carrier.Biosynthesis	Sex	Female	2.39392	0.42827	1.53e-07	7.65e-07	118
Chlorophyll.Biosynthesis	Sex	Female	2.42736	0.416489	5.13e-08	3.59e-07	118
Protein.Modification	Sex	Female	2.48944	0.535027	8.75e-06	1.39e-05	118

## Sheet: Northern M v F
Pathway	Comparison	Reference	coefficient	stderr	pval	qval	N
Vitamin.B5..Pantothenic.Acid..Biosynthesis	Sex	Female	-1.21076	0.083589	2.69e-26	1.83e-24	102
Vitamin.B2..Riboflavin..Biosynthesis	Sex	Female	-1.12738	0.081667	6.73e-25	2.29e-23	102
Nucleoside.and.Nucleotide.Biosynthesis	Sex	Female	-0.62435	0.04553	1.04e-24	2.36e-23	102
Coenzyme.A.Biosynthesis	Sex	Female	-0.84173	0.068328	9.1e-22	1.55e-20	102
Vitamin.B12..Cobalamin..Biosynthesis	Sex	Female	2.8692	0.253498	1.31e-19	1.78e-18	102
Tetrapyrrole.Biosynthesis	Sex	Female	-0.92564	0.082461	2.08e-19	2.36e-18	102
Vitamin.B3..Nicotinamide..Biosynthesis	Sex	Female	-0.68199	0.064075	3.86e-18	3.75e-17	102
Hormone..Neurotransmitter..and.Signaling.Molecule.Degradation	Sex	Female	2.72578	0.261249	1.11e-17	9.44e-17	102
Enzyme.Cofactor.Biosynthesis	Sex	Female	2.58261	0.249447	1.67e-17	1.26e-16	102
Aspartate.Superpathway	Sex	Female	3.00007	0.293556	3.27e-17	2.22e-16	102
Amide..Amidine..Amine..and.Polyamine.Degradation	Sex	Female	2.78805	0.282279	1.84e-16	1.14e-15	102
Amino.Acid.Biosynthesis	Sex	Female	0.524215	0.054337	5.87e-16	3.33e-15	102
Inorganic.Nutrient.Metabolism	Sex	Female	2.60357	0.273811	1.18e-15	6.19e-15	102
Butanediol.Biosynthesis	Sex	Female	3.58168	0.380033	1.81e-15	8.78e-15	102
Generation.of.Precursor.Metabolites.and.Energy	Sex	Female	0.43793	0.046988	3.06e-15	1.39e-14	102
Secondary.Metabolite.Biosynthesis	Sex	Female	0.590169	0.063677	3.98e-15	1.69e-14	102
Chlorophyll.Biosynthesis	Sex	Female	4.78727	0.524029	7.77e-15	3.11e-14	102
Electron.Carrier.Biosynthesis	Sex	Female	3.80565	0.417501	8.6e-15	3.25e-14	102
Alcohol.Degradation	Sex	Female	2.07908	0.229957	1.25e-14	4.41e-14	102
Carboxylic.Acid.Degradation	Sex	Female	2.48543	0.27513	1.3e-14	4.41e-14	102
Carrier.Biosynthesis	Sex	Female	2.30958	0.259943	2.74e-14	8.87e-14	102
Reductant.Biosynthesis	Sex	Female	2.45932	0.277103	2.88e-14	8.9e-14	102
Storage.Compound.Biosynthesis	Sex	Female	2.84107	0.322275	3.88e-14	1.15e-13	102
Cyclitol.Degradation	Sex	Female	2.86733	0.328803	6.25e-14	1.77e-13	102
TCA.cycle	Sex	Female	2.43599	0.280349	7.32e-14	1.99e-13	102
Chlorinated.Compound.Degradation	Sex	Female	3.71199	0.435507	1.68e-13	4.39e-13	102
CO2.Fixation	Sex	Female	1.80121	0.216374	4.53e-13	1.14e-12	102
D.glucarate.and.D.galactarate.Degradation.Superpathway	Sex	Female	2.40726	0.290525	5.49e-13	1.33e-12	102
Fatty.Acid.and.Lipid.Degradation	Sex	Female	1.87188	0.227271	7.03e-13	1.65e-12	102
Amide..Amidine..Amine..and.Polyamine.Biosynthesis	Sex	Female	2.853	0.357041	2.38e-12	4.9e-12	102
Amino.Acid.Degradation	Sex	Female	2.57387	0.321845	2.3e-12	4.9e-12	102
Carboxylic.Acid.Biosynthesis	Sex	Female	-0.98183	0.12265	2.22e-12	4.9e-12	102
Vitamin.B7..Biotin..Biosynthesis	Sex	Female	2.50041	0.312774	2.34e-12	4.9e-12	102
Fatty.Acid.and.Lipid.Biosynthesis	Sex	Female	-0.52065	0.065471	2.88e-12	5.75e-12	102
Formaldehyde.Assimilation	Sex	Female	2.96019	0.377085	4.77e-12	9.26e-12	102
Arsenic.Compound.Detoxification	Sex	Female	2.85413	0.365683	5.96e-12	1.12e-11	102
Vitamin.B6..Pyridoxal..Biosynthesis	Sex	Female	2.62546	0.337572	6.82e-12	1.25e-11	102
Aromatic.Compound.Degradation	Sex	Female	2.74199	0.353869	7.86e-12	1.41e-11	102
Phenolic.Compound.Degradation	Sex	Female	2.39403	0.309486	8.38e-12	1.46e-11	102
Cell.Structure.Biosynthesis	Sex	Female	-0.61886	0.082465	2.6e-11	4.42e-11	102
Heme.Biosynthesis	Sex	Female	-0.80779	0.109799	5.33e-11	8.84e-11	102
X6.Hydroxymethyl.Dihydropterin.Diphosphate.Biosynthesis	Sex	Female	-0.75157	0.102566	6.15e-11	9.95e-11	102
Nucleoside.and.Nucleotide.Degradation	Sex	Female	2.02643	0.290271	3.27e-10	5.16e-10	102
Anhydromuropeptide.Recycling	Sex	Female	-1.09098	0.166567	2.52e-09	3.89e-09	102
Aldehyde.degradation	Sex	Female	3.27373	0.522577	9.48e-09	1.43e-08	102
Metabolite.Interconversion	Sex	Female	1.46845	0.238111	1.48e-08	2.19e-08	102
Vitamin.B1..Thiamine..Biosynthesis	Sex	Female	-0.34529	0.057315	2.84e-08	4.11e-08	102
Glycolysis	Sex	Female	-0.31272	0.053734	7.14e-08	1.01e-07	102
Carbohydrate.Degradation	Sex	Female	1.79759	0.309353	7.43e-08	1.03e-07	102
Aminoacyl.tRNA.Charging	Sex	Female	1.62481	0.319613	1.73e-06	2.35e-06	102
Aromatic.Compound.Biosynthesis	Sex	Female	2.60605	0.517895	2.15e-06	2.86e-06	102
Formaldehyde.Oxidation	Sex	Female	2.55308	0.526959	4.64e-06	6.06e-06	102
Polyprenyl.Biosynthesis	Sex	Female	0.860745	0.183287	8.46e-06	1.09e-05	102
Vitamin.B6.Biosynthesis	Sex	Female	1.37044	0.308866	2.35e-05	2.96e-05	102
Nucleic.Acid.Processing	Sex	Female	-0.55424	0.126649	2.97e-05	3.67e-05	102
Toxin.Biosynthesis	Sex	Female	2.25099	0.516359	3.17e-05	3.85e-05	102
Protein.Modification	Sex	Female	1.73213	0.448179	0.000198	0.000236	102
Vitamin.C..L.Ascorbate..Degradation	Sex	Female	1.31845	0.341849	0.000203	0.000239	102
Nicotine.Degradation	Sex	Female	1.32556	0.394981	0.001119	0.00129	102
Fucose.and.Rhamnose.Degradation.Superpathway	Sex	Female	1.14191	0.343782	0.001251	0.001417	102
Carbohydrate.Biosynthesis	Sex	Female	-0.14295	0.043329	0.001345	0.001499	102
Vitamin.E..Tocotrienols..Biosynthesis	Sex	Female	0.844634	0.271099	0.002396	0.002628	102
Quinol.and.Quinone.Biosynthesis	Sex	Female	-0.46046	0.15315	0.003341	0.003606	102
Metabolic.Regulator.Biosynthesis	Sex	Female	-0.46123	0.203648	0.025682	0.027287	102
Peptidoglycan.Biosynthesis	Sex	Female	0.663345	0.303782	0.031328	0.032774	102

## Sheet: Colony M v F
Pathway	Comparison	Reference	coefficient	stderr	pval	qval	N
Peptidoglycan.Biosynthesis	Sex	Female	2.5454	0.441873	1.33e-06	8.75e-05	39
Aldehyde.Degradation	Sex	Female	2.50476	0.456702	3.13e-06	0.000103	39
Formaldehyde.Oxidation	Sex	Female	2.33898	0.51131	5.21e-05	0.001146	39
Metabolite.Interconversion	Sex	Female	0.546032	0.136802	0.000299	0.004934	39
Electron.Carrier.Biosynthesis	Sex	Female	1.662	0.53338	0.003535	0.046661	39

## Sheet: Sex Lefse
Pathway	LDA score	label
Nucleoside and Nucleotide Biosynthesis	-4.33772	Female
Fatty Acid and Lipid Biosynthesis	-4.13751	Female
Cell Structure Biosynthesis	-4.08911	Female
Coenzyme A Biosynthesis	-3.7768	Female
Heme Biosynthesis	-3.75047	Female
Carboxylic Acid Biosynthesis	-3.64614	Female
Tetrapyrrole Biosynthesis	-3.62623	Female
Vitamin B3 (Nicotinamide) Biosynthesis	-3.55849	Female
Anhydromuropeptide Recycling	-3.47036	Female
Carbohydrate Biosynthesis	-3.41797	Female
Vitamin B5 (Pantothenic Acid) Biosynthesis	-3.37158	Female
Vitamin B2 (Riboflavin) Biosynthesis	-3.35679	Female
Vitamin B1 (Thiamine) Biosynthesis	-3.34216	Female
6-Hydroxymethyl-Dihydropterin Diphosphate Biosynthesis	-3.28545	Female
Nucleic Acid Processing	-3.22331	Female
Metabolic Regulator Biosynthesis	-2.98333	Female
Fucose and Rhamnose Degradation Superpathway	1.80321	Male
Chloroaromatic Compound Degradation	1.85339	Male
Vitamin C (L-Ascorbate) Degradation	1.87482	Male
Aldehyde degradation	2.11968	Male
Toxin Biosynthesis	2.16829	Male
Arsenic Compound Detoxification	2.2759	Male
Storage Compound Biosynthesis	2.27804	Male
Formaldehyde Oxidation	2.28371	Male
Aromatic Compound Biosynthesis	2.33409	Male
Reductant Biosynthesis	2.4474	Male
Carrier Biosynthesis	2.54526	Male
Vitamin B7 (Biotin) Biosynthesis	2.57163	Male
Vitamin B6 (Pyridoxal) Biosynthesis	2.59246	Male
D-glucarate and D-galactarate Degradation Superpathway	2.62378	Male
Phenolic Compound Degradation	2.63184	Male
Chlorinated Compound Degradation	2.65187	Male
Vitamin B6 Biosynthesis	2.67607	Male
Aspartate Superpathway	2.69691	Male
Chlorophyll Biosynthesis	2.86558	Male
Polyprenyl Biosynthesis	2.92404	Male
Electron Carrier Biosynthesis	2.9841	Male
Butanediol Biosynthesis	3.01994	Male
Hormone, Neurotransmitter, and Signaling Molecule Degradation	3.02021	Male
Cyclitol Degradation	3.12207	Male
Vitamin B12 (Cobalamin) Biosynthesis	3.12542	Male
TCA cycle	3.15319	Male
Formaldehyde Assimilation	3.17571	Male
Amide, Amidine, Amine, and Polyamine Biosynthesis	3.305	Male
Enzyme Cofactor Biosynthesis	3.33275	Male
Amino Acid Degradation	3.38081	Male
CO2 Fixation	3.40822	Male
Alcohol Degradation	3.41845	Male
Carboxylic Acid Degradation	3.45612	Male
Secondary Metabolite Biosynthesis	3.5118	Male
Amide, Amidine, Amine, and Polyamine Degradation	3.5133	Male
Inorganic Nutrient Metabolism	3.60582	Male
Aromatic Compound Degradation	3.67943	Male
Fatty Acid and Lipid Degradation	3.69321	Male
Generation of Precursor Metabolites and Energy	3.71114	Male
Carbohydrate Degradation	3.81579	Male
Nucleoside and Nucleotide Degradation	3.92985	Male
Amino Acid Biosynthesis	4.12923	Male

## Sheet: Males W v N
Pathway	Comparison	Reference	coefficient	stderr	pval	qval	N
Protein.Modification	Boundary	Northern	4.20294	0.56147	2.12e-11	1.5e-09	109
Aspartate.Superpathway	Boundary	Northern	-1.72055	0.243694	1.74e-10	6.18e-09	109
Vitamin.B5..Pantothenic.Acid..Biosynthesis	Boundary	Northern	0.555633	0.098697	1.47e-07	3.47e-06	109
Nicotine.Degradation	Boundary	Northern	2.73074	0.500687	3.2e-07	5.67e-06	109
Vitamin.B3..Nicotinamide..Biosynthesis	Boundary	Northern	0.300927	0.058474	1.21e-06	1.72e-05	109
Aminoacyl.tRNA.Charging	Boundary	Northern	-1.03094	0.209734	3.21e-06	3.8e-05	109
Glycolysis	Boundary	Northern	0.261103	0.054701	5.78e-06	5.86e-05	109
Vitamin.B2..Riboflavin..Biosynthesis	Boundary	Northern	0.464937	0.09934	8.43e-06	7.49e-05	109
Quinol.and.Quinone.Biosynthesis	Boundary	Northern	0.514302	0.111516	1.11e-05	7.89e-05	109
Secondary.Metabolite.Biosynthesis	Boundary	Northern	-0.28466	0.061719	1.11e-05	7.89e-05	109
Coenzyme.M.Bionsythesis	Boundary	Northern	1.78481	0.40529	2.53e-05	0.000163	109
Vitamin.B9..Folic.Acid..Biosynthesis	Boundary	Northern	0.159391	0.036946	3.58e-05	0.000212	109
Enzyme.Cofactor.Biosynthesis	Boundary	Northern	-0.87586	0.210972	6.65e-05	0.000363	109
Aldehyde.degradation	Boundary	Northern	-2.19528	0.54078	9.39e-05	0.000476	109
Carbohydrate.Biosynthesis	Boundary	Northern	0.115124	0.029017	0.000132	0.000538	109
Electron.Carrier.Biosynthesis	Boundary	Northern	-1.37982	0.348351	0.000135	0.000538	109
Hormone..Neurotransmitter..and.Signaling.Molecule.Degradation	Boundary	Northern	-0.81488	0.205901	0.000136	0.000538	109
Nucleoside.and.Nucleotide.Biosynthesis	Boundary	Northern	0.223152	0.05596	0.000122	0.000538	109
Carboxylic.Acid.Biosynthesis	Boundary	Northern	0.431125	0.110009	0.000157	0.000587	109
Coenzyme.A.Biosynthesis	Boundary	Northern	0.320797	0.08219	0.000166	0.000591	109
Amino.Acid.Degradation	Boundary	Northern	-0.94524	0.248742	0.000241	0.000814	109
Tetrapyrrole.Biosynthesis	Boundary	Northern	0.362993	0.09655	0.000278	0.000896	109
CO2.Fixation	Boundary	Northern	-0.44604	0.123488	0.000464	0.001379	109
D.glucarate.and.D.galactarate.Degradation.Superpathway	Boundary	Northern	-0.92565	0.256348	0.000466	0.001379	109
Carboxylic.Acid.Degradation	Boundary	Northern	-0.7375	0.205815	0.000512	0.001455	109
Vitamin.B12..Cobalamin..Biosynthesis	Boundary	Northern	-0.75305	0.215495	0.000692	0.00189	109
Secondary.Metabolite.Degradation	Boundary	Northern	2.08298	0.605389	0.000828	0.002178	109
Amino.Acid.Biosynthesis	Boundary	Northern	-0.1952	0.057929	0.001047	0.002655	109
Anhydromuropeptide.Recycling	Boundary	Northern	0.526489	0.161131	0.001459	0.003572	109
Fatty.Acid.and.Lipid.Degradation	Boundary	Northern	-0.55904	0.17271	0.001609	0.003808	109
Cyclitol.Degradation	Boundary	Northern	-0.72148	0.225413	0.001805	0.004134	109
X6.Hydroxymethyl.Dihydropterin.Diphosphate.Biosynthesis	Boundary	Northern	0.262193	0.084376	0.002417	0.005363	109
Vitamin.B6.Degradation	Boundary	Northern	0.815592	0.26419	0.002574	0.005538	109
Inorganic.Nutrient.Metabolism	Boundary	Northern	-0.63395	0.207214	0.002803	0.005854	109
Alcohol.Degradation	Boundary	Northern	-0.55632	0.18268	0.002927	0.005937	109
Aromatic.Compound.Degradation	Boundary	Northern	-0.74383	0.24735	0.003286	0.00614	109
Arsenic.Compound.Detoxification	Boundary	Northern	0.934895	0.310217	0.003223	0.00614	109
Toxin.Biosynthesis	Boundary	Northern	-1.29531	0.429329	0.00319	0.00614	109
Formaldehyde.Assimilation	Boundary	Northern	-0.6856	0.23389	0.004128	0.007516	109
Amide..Amidine..Amine..and.Polyamine.Biosynthesis	Boundary	Northern	-0.59575	0.205971	0.004632	0.008222	109
Amide..Amidine..Amine..and.Polyamine.Degradation	Boundary	Northern	-0.63761	0.230022	0.006574	0.011384	109
Heme.Biosynthesis	Boundary	Northern	0.306305	0.115153	0.009016	0.015242	109
Degradation.Utilizatiossimilation	Boundary	Northern	0.483473	0.194449	0.014451	0.023861	109
Nucleoside.and.Nucleotide.Degradation	Boundary	Northern	-0.35888	0.15725	0.024455	0.039462	109
Vitamin.E..Tocotrienols..Biosynthesis	Boundary	Northern	-0.78634	0.34793	0.025844	0.040776	109
C1.Compound.Utilization.and.Assimilation	Boundary	Northern	1.33649	0.6115	0.031025	0.047887	109
Storage.Compound.Biosynthesis	Boundary	Northern	-0.5925	0.272615	0.031955	0.048273	109

## Sheet: Females W v N
Pathway	Comparison	Reference	coefficient	stderr	pval	qval	N
Protein.Modification	Boundary	Northern	2.90577	0.459379	5.71e-09	3.77e-07	111
Butanediol.Biosynthesis	Boundary	Northern	2.374	0.396775	2.83e-08	9.35e-07	111
Arsenic.Compound.Detoxification	Boundary	Northern	2.34853	0.413772	1.15e-07	2.54e-06	111
Chlorophyll.Biosynthesis	Boundary	Northern	2.5544	0.565379	1.59e-05	0.000262	111
Reductant.Biosynthesis	Boundary	Northern	1.19021	0.349612	0.000929	0.012262	111
Carbohydrate.Degradation	Boundary	Northern	0.941373	0.307537	0.002778	0.030495	111
Carrier.Biosynthesis	Boundary	Northern	0.993269	0.329857	0.003234	0.030495	111
Nicotine.Degradation	Boundary	Northern	0.482679	0.163743	0.003916	0.032306	111

## Sheet: Region Lefse
Pathway	LDA score	label
Vitamin B6 Degradation	1.4194	Western
Protein Modification	1.95549	Western
